# Supplementary material for: socru: typing of genome-level order and orientation around ribosomal operons in bacteria
Source: PubMed Central journal article supplement (PMC7478630; doi:10.1099/mgen.0.000396), 2020-06-25

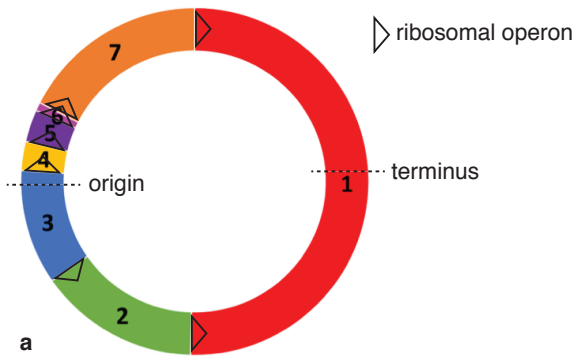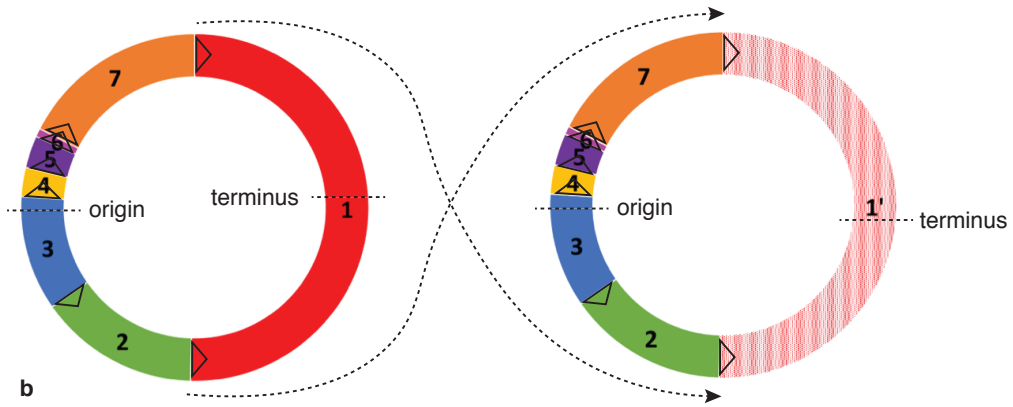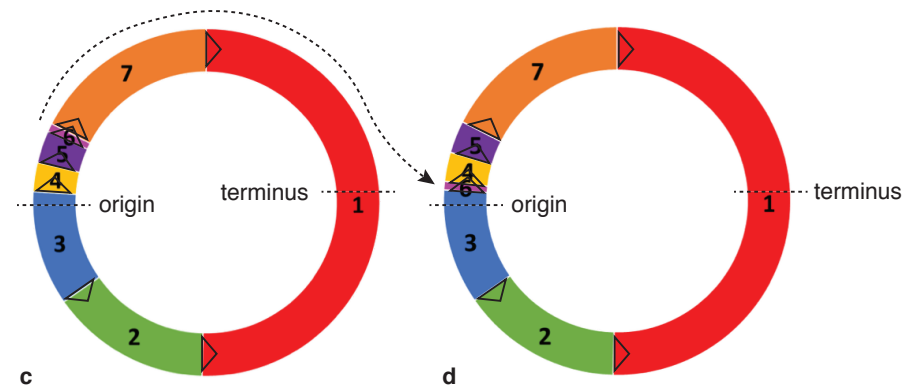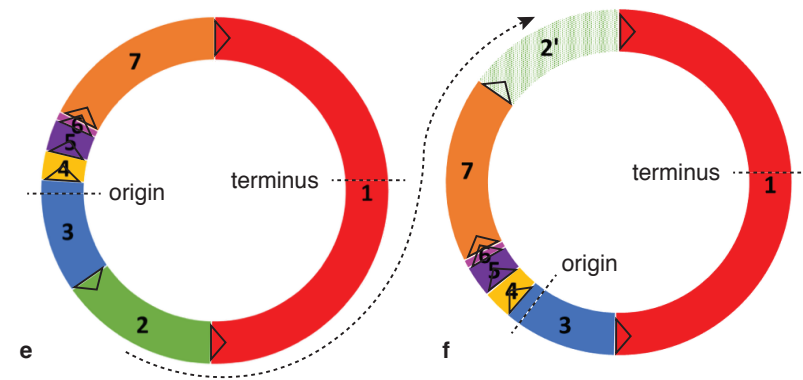

Supplement: mgen-6-396-s001.pdf [file mgen-6-396-s001.pdf]
